# Supplementary material for: Overexpression of mitochondrial creatine kinase preserves cardiac energetics without ameliorating murine chronic heart failure
Source: PubMed Central journal article supplement (PMC6954138; doi:10.1007/s00395-020-0777-3), 2020-01-10
Supplement: 395_2020_777_MOESM1_ESM.pdf [file 395_2020_777_MOESM1_ESM.pdf]

## Supplementary material

Cao *et al.* Over-expression of mitochondrial creatine kinase preserves cardiac energetics without ameliorating murine chronic heart failure.

| Main study                                   | WT-SHAM | OE-SHAM | WT-TAC | OE-TAC |
|----------------------------------------------|---------|---------|--------|--------|
| Number of mice undergoing surgery            | 11      | 13      | 23     | 21     |
| Died / culled due to ill health              | 1       | 1       | 5      | 1      |
| Number with complete echo data               | 10      | 12      | 16     | 20     |
| Died during haemodynamic exam                | 0       | 0       | 2      | 1      |
| Number with haemodynamic data                | 10      | 12      | 14     | 19     |
| - Did not tolerate dobutamine                | 0       | 0       | 0      | 4      |
| Excluded due to band internalisation         | 0       | 0       | 1      | 0      |
| <b>NMR sub-group</b>                         |         |         |        |        |
| Number of mice undergoing surgery            | 6       | 7       | 12     | 9      |
| Died / culled due to ill health              | 0       | 1       | 4      | 2      |
| Number with useable <sup>31</sup> P-NMR data | 6       | 4       | 6      | 7      |

**Supplementary Table 1** Numbers and fate of all mice entering the study. Groups were wild-type (WT) and Mt-CK overexpressing mice (OE) that received either sham-operation or transverse aortic constriction (TAC).

| Experimental group | Mouse ID  | Days post-surgery | Reason for death                                               |
|--------------------|-----------|-------------------|----------------------------------------------------------------|
| WT sham            | LAFW15.2b | 21                | Euthanized due to genital mutilation (unrelated to procedure)  |
| OE sham            | LAFW26.1d | 1                 | Euthanized due to intra-thoracic bleed associated with surgery |
| WT-TAC             | LAFW7.5b  | 1                 | Euthanized due to peripheral oedema                            |
| WT-TAC             | LAFW15.3b | 31                | Died of congestive heart failure                               |
| WT-TAC             | LAFW16.2b | 1                 | Euthanized due to acute heart failure                          |
| WT-TAC             | LAFW15.3f | 1                 | Euthanized due to acute heart failure                          |
| WT-TAC             | LAFW20.2e | 6                 | Euthanized due to >15% weight loss (humane end-point)          |
| WT-TAC             | LAFW15.5a | 2                 | Euthanized due to acute heart failure                          |
| WT-TAC             | LAFW20.4b | 3                 | Euthanized due to >15% weight loss (humane end-point)          |
| WT-TAC             | LAFW20.4d | 6                 | Euthanized due to >15% weight loss (humane end-point)          |
| WT-TAC             | LAFW15.6c | 8                 | Died from aortic aneurysm                                      |
| OE-TAC             | LAFW13.4c | 11                | Died of congestive heart failure                               |
| OE-TAC             | LAFW18.5g | 5                 | Euthanized due to >15% weight loss (humane end-point)          |
| OE-TAC             | LAFW26.2a | 2                 | Euthanized due to acute heart failure                          |

**Supplementary Table 2** Causes of death for all mice not surviving until the 6 week haemodynamic examination.

|                               | <b>WT-SHAM</b> | <b>OE-SHAM</b> | <b>WT-TAC</b> | <b>OE-TAC</b> |
|-------------------------------|----------------|----------------|---------------|---------------|
| <i>Baseline</i>               | <i>(n=10)</i>  | <i>(n=12)</i>  | <i>(n=14)</i> | <i>(n=19)</i> |
| Heart rate (bpm)              | 455 ± 17       | 448 ± 16       | 454 ± 10      | 487 ± 8       |
| LV systolic pressure (mmHg)   | 102 ± 3        | 101 ± 2        | 149 ± 7 ***   | 127 ± 6 *     |
| LV diastolic pressure (mmHg)  | 5.1 ± 0.7      | 3.7 ± 0.4      | 14.5 ± 2.7 *  | 17 ± 2.6 ***  |
| dP/dt <sub>max</sub> (mmHg/s) | 8482 ± 521     | 8666 ± 495     | 6886 ± 441    | 5829 ± 483*** |
| Tau (ms)                      | 7.9 ± 0.4      | 7.4 ± 0.5      | 11.0 ± 1.1    | 12.2 ± 1.0    |
| <i>+ dobutamine</i>           | <i>(n=10)</i>  | <i>(n=12)</i>  | <i>(n=14)</i> | <i>(n=15)</i> |
| Heart rate (bpm)              | 544 ± 13       | 538 ± 10       | 518 ± 11      | 543 ± 8       |
| LV systolic pressure (mmHg)   | 103 ± 3        | 101 ± 2        | 146 ± 7 **    | 137 ± 6 **    |
| LV diastolic pressure (mmHg)  | 4.8 ± 0.5      | 3.8 ± 3.2      | 12.9 ± 2.5    | 14.3 ± 3.0 ** |
| dP/dt <sub>max</sub> (mmHg/s) | 12444 ± 657    | 12870 ± 652    | 7714 ± 608*** | 7480 ± 736*** |
| Tau (ms)                      | 6.7 ± 0.3      | 6.3 ± 0.6      | 10.2 ± 1.2    | 9.8 ± 1.0 *   |

**Supplementary Table 3** Left ventricular haemodynamic parameters measured 6 weeks after sham or TAC surgery. Data is mean ± standard error. \* denotes P<0.05, \*\* P<0.01, \*\*\* P<0.001 for comparison between Sham and TAC groups within the same genotype. There were no significant differences between genotypes, i.e. between WT-Sham vs OE-Sham and WT-TAC vs OE-TAC.
